# Supplementary material for: Configuration of the Deep Neural Network Hyperparameters for the Hypsometric Modeling of the Guazuma crinita Mart. in the Peruvian Amazon
Source: MDPI journal article supplement (doi:10.3390/f13050697), 2022-04-29
Supplement: s1 [file s1]

Table S1: Training status of each model and type of function evaluated used to predict the total height of *Guazuma crinita* Mart. in Peruvian amazon.

| Type: HT = $f(\text{DBH})$ |       |       |                      |           |          |             |            |           |          |
|----------------------------|-------|-------|----------------------|-----------|----------|-------------|------------|-----------|----------|
| Model                      | Layer | Units | Activation Functions | mean_rate | rate_rms | mean_weight | weight_rms | mean_bias | bias_rms |
| Model 1                    | 2     | 10    | Tanh                 | 0.005288  | 0.003685 | 0.021311    | 0.386007   | -0.037867 | 0.190735 |
|                            | 3     | 10    | Tanh                 | 0.053867  | 0.12416  | 0.022345    | 0.399882   | -0.155794 | 0.286331 |
|                            | 4     | 1     | Linear               | 0.003638  | 0.001681 | 0.020494    | 0.391888   | 0.323781  | -        |
| Model 2                    | 2     | 10    | Rectifier            | 0.012776  | 0.025476 | -0.117045   | 1.652177   | 0.21798   | 0.692295 |
|                            | 3     | 10    | Rectifier            | 0.044422  | 0.096909 | -0.378818   | 0.898682   | 0.923812  | 1.29197  |
|                            | 4     | 1     | Linear               | 0.006908  | 0.004852 | -0.060404   | 0.243376   | 1.031046  | -        |
| Model 3                    | 2     | 10    | Maxout               | 0.009912  | 0.005729 | -0.241702   | 0.754611   | 0.220769  | 0.72499  |
|                            | 3     | 10    | Maxout               | 0.101494  | 0.105416 | -0.187832   | 0.824429   | -0.082966 | 0.76201  |
|                            | 4     | 1     | Linear               | 0.000978  | 0.000443 | -0.038951   | 0.095256   | 0.294547  | -        |
| Model 4                    | 2     | 10    | Tanh                 | 0.006474  | 0.006683 | -0.20723    | 0.560469   | -0.139594 | 0.489601 |
|                            | 3     | 5     | Tanh                 | 0.068002  | 0.132978 | 0.013591    | 0.744229   | -0.025685 | 0.756752 |
|                            | 4     | 1     | Linear               | 0.00164   | 0.000041 | 0.276363    | 0.578557   | 0.66394   | -        |
| Model 5                    | 2     | 10    | Rectifier            | 0.010012  | 0.007362 | -0.328422   | 1.739334   | 0.456076  | 1.485665 |
|                            | 3     | 5     | Rectifier            | 0.037994  | 0.06651  | -0.361117   | 0.751499   | 0.92453   | 0.713777 |
|                            | 4     | 1     | Linear               | 0.006308  | 0.007244 | -0.087139   | 0.231406   | 0.452973  | -        |
| Model 6                    | 2     | 10    | Maxout               | 0.006717  | 0.003152 | 0.242839    | 0.803508   | 0.224945  | 0.526215 |
|                            | 3     | 5     | Maxout               | 0.075364  | 0.087105 | -0.212851   | 0.829533   | 0.570804  | 0.613968 |
|                            | 4     | 1     | Linear               | 0.000593  | 0.000215 | -0.039182   | 0.142219   | 0.312809  | -        |
| Model 7                    | 2     | 10    | Tanh                 | 0.005107  | 0.003614 | 0.226332    | 0.493941   | 0.115645  | 0.356405 |
|                            | 3     | 5     | Tanh                 | 0.010561  | 0.009429 | 0.008822    | 0.415886   | 0.079245  | 0.216471 |

|          |   |    |           |          |          |           |          |           |          |
|----------|---|----|-----------|----------|----------|-----------|----------|-----------|----------|
| Model 8  | 4 | 2  | Tanh      | 0.003249 | 0.001587 | -0.048279 | 0.539461 | -0.059875 | 0.425239 |
|          | 5 | 1  | Linear    | 0.002426 | 0.000775 | 1.230515  | 0.184479 | 0.555077  | -        |
|          | 2 | 10 | Rectifier | 0.002728 | 0.001438 | 0.073304  | 0.390288 | 0.459156  | 0.163112 |
|          | 3 | 5  | Rectifier | 0.005348 | 0.003477 | -0.057142 | 0.383146 | 1.067797  | 0.096123 |
|          | 4 | 2  | Rectifier | 0.00206  | 0.002665 | -0.131849 | 0.425406 | 0.979     | 0.044021 |
| Model 9  | 5 | 1  | Linear    | 0.00124  | 0.000315 | 0.861587  | 0.378312 | -1.501417 | -        |
|          | 2 | 10 | Maxout    | 0.01108  | 0.006948 | -0.191155 | 1.081776 | 0.385681  | 1.034667 |
|          | 3 | 5  | Maxout    | 0.027372 | 0.025291 | -0.319217 | 1.299755 | 0.76679   | 0.693736 |
|          | 4 | 2  | Maxout    | 0.024533 | 0.029297 | 0.010125  | 0.402798 | 0.335492  | 0.65869  |
|          | 5 | 1  | Linear    | 0.000334 | 0.000125 | 0.080591  | 0.060422 | 0.232801  | -        |
| Model 10 | 2 | 50 | Tanh      | 0.017163 | 0.012758 | 0.002687  | 0.181689 | -0.018622 | 0.07772  |
|          | 3 | 50 | Tanh      | 0.572428 | 0.334587 | -0.001431 | 0.158201 | 0.002774  | 0.22884  |
|          | 4 | 1  | Linear    | 0.021519 | 0.015405 | 0.015434  | 0.10395  | 0.483542  | -        |
| Model 11 | 2 | 50 | Rectifier | 0.021061 | 0.027661 | -0.141957 | 0.432917 | -0.016558 | 0.267611 |
|          | 3 | 50 | Rectifier | 0.223551 | 0.219337 | -0.128903 | 0.22229  | 0.527457  | 0.358442 |
|          | 4 | 1  | Linear    | 0.009492 | 0.00708  | -0.001666 | 0.100877 | 0.201977  | -        |
| Model 12 | 2 | 50 | Maxout    | 0.020393 | 0.013958 | 0.014047  | 0.235064 | 0.164763  | 0.161228 |
|          | 3 | 50 | Maxout    | 0.391859 | 0.227942 | -0.077171 | 0.174313 | 0.685883  | 0.167094 |
|          | 4 | 1  | Linear    | 0.004604 | 0.00225  | -0.002641 | 0.040984 | 0.352635  | -        |
| Model 13 | 2 | 50 | Tanh      | 0.018809 | 0.014636 | -0.048787 | 0.218471 | -0.017254 | 0.145774 |
|          | 3 | 25 | Tanh      | 0.445006 | 0.31434  | -0.003051 | 0.208599 | 0.026783  | 0.363791 |
|          | 4 | 1  | Linear    | 0.008237 | 0.005922 | 0.002938  | 0.198564 | 0.549527  | -        |
| Model 14 | 2 | 50 | Rectifier | 0.013768 | 0.009933 | -0.02661  | 0.296982 | 0.147968  | 0.192563 |
|          | 3 | 25 | Rectifier | 0.189842 | 0.213778 | -0.130932 | 0.255321 | 0.642462  | 0.203325 |
|          | 4 | 1  | Linear    | 0.0048   | 0.003984 | 0.020316  | 0.136499 | 0.223115  | -        |
| Model 15 | 2 | 50 | Maxout    | 0.022484 | 0.014044 | 0.009247  | 0.255737 | 0.123765  | 0.202516 |
|          | 3 | 25 | Maxout    | 0.31044  | 0.197662 | -0.083304 | 0.240276 | 0.717525  | 0.241659 |

|          |   |    |           |          |          |           |          |           |          |
|----------|---|----|-----------|----------|----------|-----------|----------|-----------|----------|
| Model 16 | 4 | 1  | Linear    | 0.002762 | 0.001212 | -0.009338 | 0.057466 | 0.245757  | -        |
|          | 2 | 50 | Tanh      | 0.013232 | 0.007198 | 0.001698  | 0.190443 | -0.011645 | 0.07832  |
|          | 3 | 25 | Tanh      | 0.069034 | 0.061568 | -0.001791 | 0.192131 | 0.038288  | 0.379959 |
|          | 4 | 5  | Tanh      | 0.00934  | 0.00625  | -0.011991 | 0.225944 | 0.043068  | 0.183445 |
|          | 5 | 1  | Linear    | 0.002299 | 0.000779 | -0.135929 | 0.41604  | 0.395638  | -        |
| Model 17 | 2 | 50 | Rectifier | 0.023336 | 0.018794 | -0.01774  | 0.423612 | 0.132823  | 0.268851 |
|          | 3 | 25 | Rectifier | 0.074543 | 0.094463 | -0.10428  | 0.224688 | 0.709282  | 0.160897 |
|          | 4 | 5  | Rectifier | 0.020346 | 0.021536 | -0.056702 | 0.250647 | 0.775874  | 0.227725 |
|          | 5 | 1  | Linear    | 0.002895 | 0.002006 | 0.023313  | 0.3077   | 0.120382  | -        |
|          | 2 | 50 | Maxout    | 0.029238 | 0.021821 | 0.016593  | 0.371502 | 0.126507  | 0.28224  |
| Model 18 | 3 | 25 | Maxout    | 0.305365 | 0.230256 | -0.082312 | 0.25741  | 0.764871  | 0.231204 |
|          | 4 | 5  | Maxout    | 0.13055  | 0.10304  | -0.006836 | 0.216426 | 0.502866  | 0.295506 |
|          | 5 | 1  | Linear    | 0.001072 | 0.000486 | -0.029274 | 0.063983 | 0.30857   | -        |
|          | 2 | 10 | Tanh      | 0.008977 | 0.012922 | 0.141812  | 0.811396 | -0.063835 | 0.802573 |
|          | 3 | 5  | Tanh      | 0.007024 | 0.004317 | -0.017906 | 0.785019 | 0.323706  | 1.076737 |
| Model 19 | 4 | 2  | Tanh      | 0.002189 | 0.001235 | 0.107535  | 0.503578 | -0.419931 | 0.105351 |
|          | 5 | 5  | Tanh      | 0.005268 | 0.003923 | 0.631689  | 0.739163 | 0.73238   | 0.392391 |
|          | 6 | 10 | Tanh      | 0.15244  | 0.203951 | 0.190329  | 0.764928 | -0.022733 | 0.902866 |
|          | 7 | 1  | Linear    | 0.003181 | 0.001931 | 0.234391  | 0.516946 | -0.167213 | -        |
|          | 2 | 10 | Rectifier | 0.007119 | 0.006144 | -0.42765  | 1.636196 | 0.111055  | 0.545078 |
| Model 20 | 3 | 5  | Rectifier | 0.069577 | 0.142849 | -0.247106 | 1.601126 | -0.16071  | 0.935519 |
|          | 4 | 2  | Rectifier | 0.008582 | 0.011535 | -0.057934 | 0.540514 | 1.077682  | 0.606853 |
|          | 5 | 5  | Rectifier | 0.005909 | 0.003037 | -0.098087 | 0.784318 | 1.218145  | 0.21964  |
|          | 6 | 10 | Rectifier | 0.125711 | 0.140732 | -0.280794 | 0.403943 | 0.758205  | 0.493093 |
|          | 7 | 1  | Linear    | 0.023965 | 0.022115 | -0.058857 | 0.246676 | 0.387243  | -        |
| Model 21 | 2 | 10 | Maxout    | 0.008397 | 0.00319  | 0.008585  | 0.683165 | 0.211132  | 0.402068 |
|          | 3 | 5  | Maxout    | 0.011669 | 0.007023 | -0.151383 | 0.500162 | 0.919233  | 0.152825 |

| Model 22                               | 4     | 2     | Maxout               | 0.004838  | 0.002794 | -0.055487   | 0.549067   | 1.026638  | 0.131028 |
|----------------------------------------|-------|-------|----------------------|-----------|----------|-------------|------------|-----------|----------|
|                                        | 5     | 5     | Maxout               | 0.00287   | 0.003093 | -0.269966   | 0.349632   | 0.614307  | 0.348672 |
|                                        | 6     | 10    | Maxout               | 0.052884  | 0.069667 | -0.034719   | 0.534209   | 0.314404  | 0.477013 |
|                                        | 7     | 1     | Linear               | 0.001689  | 0.000803 | -0.013319   | 0.12341    | 0.296012  | -        |
|                                        | 2     | 50    | Tanh                 | 0.020482  | 0.021247 | -0.005951   | 0.204047   | 0.00167   | 0.123358 |
|                                        | 3     | 25    | Tanh                 | 0.259443  | 0.273511 | 0.000908    | 0.215738   | 0.04218   | 0.537679 |
|                                        | 4     | 5     | Tanh                 | 0.016603  | 0.021618 | 0.010695    | 0.222403   | 0.137257  | 0.193609 |
| Model 23                               | 5     | 25    | Tanh                 | 0.039115  | 0.044362 | 0.052823    | 0.278139   | -0.005306 | 0.124673 |
|                                        | 6     | 50    | Tanh                 | 0.465643  | 0.261053 | -0.00404    | 0.175584   | 0.033898  | 0.171531 |
|                                        | 7     | 1     | Linear               | 0.010012  | 0.004925 | -0.012949   | 0.132248   | 0.51069   | -        |
|                                        | 2     | 50    | Rectifier            | 0.017377  | 0.009424 | 0.003171    | 0.428831   | 0.393296  | 0.283359 |
|                                        | 3     | 25    | Rectifier            | 0.066637  | 0.06594  | -0.076189   | 0.257407   | 0.75215   | 0.191666 |
|                                        | 4     | 5     | Rectifier            | 0.09815   | 0.248416 | -0.009843   | 0.28746    | 0.735915  | 0.182954 |
|                                        | 5     | 25    | Rectifier            | 0.067326  | 0.077137 | -0.143571   | 0.271957   | 0.865523  | 0.119947 |
| Model 24                               | 6     | 50    | Rectifier            | 0.344616  | 0.248212 | -0.122489   | 0.203684   | 0.598214  | 0.14545  |
|                                        | 7     | 1     | Linear               | 0.017113  | 0.012344 | 0.001792    | 0.062636   | 0.247116  | -        |
|                                        | 2     | 50    | Maxout               | 0.006957  | 0.0039   | -0.011082   | 0.200952   | 0.494865  | 0.023926 |
|                                        | 3     | 25    | Maxout               | 0.157773  | 0.354118 | -0.007532   | 0.164971   | 0.996696  | 0.014238 |
|                                        | 4     | 5     | Maxout               | 0.104044  | 0.29786  | 0.000476    | 0.24885    | 0.997684  | 0.003566 |
|                                        | 5     | 25    | Maxout               | 0.10485   | 0.29754  | 0.00147     | 0.25756    | 0.994827  | 0.009394 |
|                                        | 6     | 50    | Maxout               | 0.265461  | 0.425796 | -0.003916   | 0.166159   | 0.999112  | 0.004082 |
|                                        | 7     | 1     | Linear               | 0.000809  | 0.000838 | 0.00352     | 0.193558   | -0.000261 | -        |
| Type: HT = $f(\text{DBH}, \text{Age})$ |       |       |                      |           |          |             |            |           |          |
| Model                                  | Layer | Units | Activation Functions | mean_rate | rate_rms | mean_weight | weight_rms | mean_bias | bias_rms |
| Model 1                                | 2     | 10    | Tanh                 | 0.013392  | 0.010501 | 0.022735    | 0.397923   | -0.139631 | 0.668919 |

|         |   |    |           |          |          |           |          |           |          |
|---------|---|----|-----------|----------|----------|-----------|----------|-----------|----------|
| Model 2 | 3 | 10 | Tanh      | 0.241346 | 0.32962  | 0.049193  | 0.476099 | -0.127572 | 0.418506 |
|         | 4 | 1  | Linear    | 0.007934 | 0.002987 | 0.028663  | 0.319427 | 0.526442  | -        |
|         | 2 | 10 | Rectifier | 0.012739 | 0.01195  | 0.010719  | 0.379649 | 0.459336  | 0.184666 |
|         | 3 | 10 | Rectifier | 0.017976 | 0.013664 | -0.039203 | 0.367796 | 0.974985  | 0.081726 |
|         | 4 | 1  | Linear    | 0.013814 | 0.030866 | -0.136573 | 0.366718 | -0.013839 | -        |
| Model 3 | 2 | 10 | Maxout    | 0.020799 | 0.014171 | -0.034948 | 0.514198 | 0.228056  | 0.371711 |
|         | 3 | 10 | Maxout    | 0.184534 | 0.19311  | -0.242117 | 0.668496 | 0.83434   | 0.726659 |
|         | 4 | 1  | Linear    | 0.002508 | 0.000897 | 0.029634  | 0.126282 | 0.216651  | -        |
| Model 4 | 2 | 10 | Tanh      | 0.014396 | 0.014091 | 0.079911  | 0.59519  | -0.230471 | 0.399458 |
|         | 3 | 5  | Tanh      | 0.042805 | 0.064978 | 0.066417  | 0.608436 | 0.097547  | 0.516542 |
|         | 4 | 1  | Linear    | 0.005705 | 0.001172 | 0.463966  | 0.319808 | 0.483255  | -        |
|         | 2 | 10 | Rectifier | 0.011552 | 0.010203 | -0.152842 | 1.160541 | -0.002855 | 0.50202  |
| Model 5 | 3 | 5  | Rectifier | 0.035967 | 0.054322 | -0.211407 | 1.361495 | 0.786501  | 1.381041 |
|         | 4 | 1  | Linear    | 0.001174 | 0.000377 | 0.026575  | 0.204279 | -0.082318 | -        |
|         | 2 | 10 | Maxout    | 0.016662 | 0.02419  | -0.024193 | 0.478394 | 0.306039  | 0.402415 |
| Model 6 | 3 | 5  | Maxout    | 0.103908 | 0.157971 | -0.151068 | 0.51938  | 0.677007  | 0.43519  |
|         | 4 | 1  | Linear    | 0.001291 | 0.000559 | 0.055038  | 0.152522 | 0.166435  | -        |
|         | 2 | 10 | Tanh      | 0.016743 | 0.019343 | -0.05337  | 0.919623 | -0.593755 | 0.820155 |
| Model 7 | 3 | 5  | Tanh      | 0.011911 | 0.007763 | 0.032557  | 0.631117 | 0.412039  | 0.292834 |
|         | 4 | 2  | Tanh      | 0.00326  | 0.00042  | -0.110929 | 0.694161 | -0.364091 | 0.101451 |
|         | 5 | 1  | Linear    | 0.006241 | 0.000165 | 0.008972  | 1.275747 | 0.793039  | -        |
| Model 8 | 2 | 10 | Rectifier | 0.014028 | 0.012309 | -0.165232 | 0.906605 | 0.148208  | 0.747434 |
|         | 3 | 5  | Rectifier | 0.038661 | 0.044773 | -0.308718 | 1.014644 | 0.777501  | 0.937558 |
|         | 4 | 2  | Rectifier | 0.041289 | 0.057254 | -0.333713 | 0.734595 | 1.508716  | 1.190294 |
|         | 5 | 1  | Linear    | 0.002284 | 0.001519 | -0.38766  | 0.246361 | 2.613168  | -        |
| Model 9 | 2 | 10 | Maxout    | 0.018455 | 0.013417 | -0.165103 | 1.232214 | 0.348259  | 0.838624 |
|         | 3 | 5  | Maxout    | 0.071663 | 0.155636 | -0.246977 | 0.973543 | 0.963306  | 0.778643 |

|          |   |    |           |          |          |           |          |           |          |
|----------|---|----|-----------|----------|----------|-----------|----------|-----------|----------|
| Model 10 | 4 | 2  | Maxout    | 0.023711 | 0.023624 | -0.117507 | 0.477323 | 0.779057  | 0.331987 |
|          | 5 | 1  | Linear    | 0.000615 | 0.000388 | -0.072257 | 0.062214 | 0.447027  | -        |
|          | 2 | 50 | Tanh      | 0.067924 | 0.068821 | -0.001193 | 0.202289 | -0.007194 | 0.187573 |
|          | 3 | 50 | Tanh      | 0.766575 | 0.286964 | 0.009383  | 0.181453 | 0.092582  | 0.451523 |
| Model 11 | 4 | 1  | Linear    | 0.03344  | 0.018949 | -0.021267 | 0.140644 | 0.537915  | -        |
|          | 2 | 50 | Rectifier | 0.028431 | 0.024209 | -0.051378 | 0.35552  | -0.114871 | 0.369806 |
|          | 3 | 50 | Rectifier | 0.429604 | 0.261925 | -0.14792  | 0.267264 | 0.385019  | 0.335556 |
| Model 12 | 4 | 1  | Linear    | 0.013567 | 0.009657 | 0.012196  | 0.094011 | 0.257106  | -        |
|          | 2 | 50 | Maxout    | 0.048532 | 0.044926 | -0.019017 | 0.226981 | 0.16641   | 0.191088 |
|          | 3 | 50 | Maxout    | 0.619277 | 0.26609  | -0.054296 | 0.18609  | 0.69796   | 0.13755  |
| Model 13 | 4 | 1  | Linear    | 0.010219 | 0.003956 | 0.003412  | 0.042035 | 0.290284  | -        |
|          | 2 | 50 | Tanh      | 0.057907 | 0.053121 | -0.002524 | 0.217197 | -0.033553 | 0.202896 |
|          | 3 | 25 | Tanh      | 0.673094 | 0.38039  | 0.005483  | 0.224152 | 0.040374  | 0.476521 |
| Model 14 | 4 | 1  | Linear    | 0.021913 | 0.014439 | 0.095707  | 0.194113 | 0.554107  | -        |
|          | 2 | 50 | Rectifier | 0.021177 | 0.015957 | -0.032315 | 0.20332  | 0.307846  | 0.139431 |
|          | 3 | 25 | Rectifier | 0.196617 | 0.248877 | -0.043703 | 0.178031 | 0.892031  | 0.071199 |
| Model 15 | 4 | 1  | Linear    | 0.007154 | 0.006949 | 0.008904  | 0.141254 | -0.00245  | -        |
|          | 2 | 50 | Maxout    | 0.049522 | 0.04682  | -0.031868 | 0.224298 | 0.284134  | 0.164038 |
|          | 3 | 25 | Maxout    | 0.496111 | 0.257602 | -0.061669 | 0.19697  | 0.90096   | 0.148948 |
| Model 16 | 4 | 1  | Linear    | 0.005677 | 0.001934 | 0.012939  | 0.06014  | 0.207553  | -        |
|          | 2 | 50 | Tanh      | 0.03104  | 0.023173 | 0.01235   | 0.165497 | -0.021132 | 0.101371 |
|          | 3 | 25 | Tanh      | 0.146765 | 0.126269 | 0.011079  | 0.187126 | -0.064713 | 0.386182 |
| Model 17 | 4 | 5  | Tanh      | 0.018984 | 0.011374 | 0.011348  | 0.243868 | -0.010863 | 0.239968 |
|          | 5 | 1  | Linear    | 0.003915 | 0.001183 | -0.008635 | 0.497322 | 0.316322  | -        |
|          | 2 | 50 | Rectifier | 0.019063 | 0.012336 | 0.021458  | 0.366252 | 0.012987  | 0.371457 |
|          | 3 | 25 | Rectifier | 0.166281 | 0.190705 | -0.145298 | 0.434534 | 0.862132  | 0.366628 |
|          | 4 | 5  | Rectifier | 0.106535 | 0.142876 | -0.052696 | 0.369015 | 1.007662  | 0.178256 |

|          |   |    |           |          |          |           |          |           |          |
|----------|---|----|-----------|----------|----------|-----------|----------|-----------|----------|
| Model 18 | 5 | 1  | Linear    | 0.005782 | 0.007066 | -0.113082 | 0.262337 | 0.433164  | -        |
|          | 2 | 50 | Maxout    | 0.046642 | 0.031173 | -0.019932 | 0.245169 | 0.3183    | 0.174529 |
|          | 3 | 25 | Maxout    | 0.433891 | 0.257827 | -0.05599  | 0.202232 | 0.9028    | 0.126074 |
|          | 4 | 5  | Maxout    | 0.291452 | 0.247823 | -0.038791 | 0.24646  | 0.824354  | 0.1596   |
|          | 5 | 1  | Linear    | 0.00246  | 0.001066 | 0.046746  | 0.092952 | 0.094926  | -        |
| Model 19 | 2 | 10 | Tanh      | 0.006032 | 0.00369  | -0.016037 | 0.387089 | -0.090557 | 0.374459 |
|          | 3 | 5  | Tanh      | 0.025913 | 0.031153 | -0.030908 | 0.448131 | -0.132551 | 0.399181 |
|          | 4 | 2  | Tanh      | 0.005286 | 0.00184  | 0.00254   | 0.466967 | 0.079671  | 0.002998 |
|          | 5 | 5  | Tanh      | 0.008078 | 0.004704 | -0.185324 | 0.755874 | 0.181212  | 0.459222 |
|          | 6 | 10 | Tanh      | 0.488689 | 0.397019 | -0.060432 | 0.49825  | -0.197827 | 0.395954 |
| Model 20 | 7 | 1  | Linear    | 0.14673  | 0.140917 | 0.066585  | 0.584625 | 0.692865  | -        |
|          | 2 | 10 | Rectifier | 0.010636 | 0.006789 | 0.011506  | 0.415305 | 0.424564  | 0.251982 |
|          | 3 | 5  | Rectifier | 0.019996 | 0.012731 | -0.073231 | 0.544145 | 0.778419  | 0.288302 |
|          | 4 | 2  | Rectifier | 0.010333 | 0.014235 | 0.265303  | 0.454966 | 0.715059  | 0.330473 |
|          | 5 | 5  | Rectifier | 0.018448 | 0.026998 | -0.084069 | 0.562869 | 0.913184  | 0.169593 |
| Model 21 | 6 | 10 | Rectifier | 0.185023 | 0.235774 | -0.304546 | 0.741861 | 0.711566  | 0.480891 |
|          | 7 | 1  | Linear    | 0.015707 | 0.018459 | -0.022214 | 0.210922 | -0.047104 | -        |
|          | 2 | 10 | Maxout    | 0.012517 | 0.016117 | -0.061299 | 0.407585 | 0.478286  | 0.075134 |
|          | 3 | 5  | Maxout    | 0.209067 | 0.400852 | 0.01965   | 0.394387 | 0.996991  | 0.009919 |
|          | 4 | 2  | Maxout    | 0.253102 | 0.430823 | -0.022949 | 0.492456 | 0.99836   | 0.002638 |
| Model 22 | 5 | 5  | Maxout    | 0.206192 | 0.40202  | -0.16031  | 0.461339 | 0.987348  | 0.021747 |
|          | 6 | 10 | Maxout    | 0.258475 | 0.428206 | -0.096765 | 0.370141 | 0.993643  | 0.017774 |
|          | 7 | 1  | Linear    | 0.003356 | 0.003439 | 0.082376  | 0.416554 | -0.010028 | -        |
|          | 2 | 50 | Tanh      | 0.043359 | 0.04434  | -0.016218 | 0.247356 | 0.022698  | 0.252767 |
|          | 3 | 25 | Tanh      | 0.275713 | 0.264228 | 0.00337   | 0.249822 | -0.0305   | 0.75161  |
|          | 4 | 5  | Tanh      | 0.035275 | 0.050262 | -0.009067 | 0.244562 | 0.217105  | 0.200625 |
|          | 5 | 25 | Tanh      | 0.303671 | 0.242349 | 0.02158   | 0.23775  | -0.017059 | 0.095469 |

| Model 23                                         | 6     | 50    | Tanh                 | 0.875672  | 0.251582 | 0.003562    | 0.156708   | 0.038976  | 0.154286 |
|--------------------------------------------------|-------|-------|----------------------|-----------|----------|-------------|------------|-----------|----------|
|                                                  | 7     | 1     | Linear               | 0.176758  | 0.119745 | 0.008364    | 0.167337   | 0.415867  | –        |
|                                                  | 2     | 50    | Rectifier            | 0.031378  | 0.025281 | –0.073093   | 0.391018   | 0.291739  | 0.30975  |
|                                                  | 3     | 25    | Rectifier            | 0.12762   | 0.109451 | –0.095163   | 0.304289   | 0.825111  | 0.348886 |
|                                                  | 4     | 5     | Rectifier            | 0.042298  | 0.04563  | –0.046346   | 0.312447   | 0.978764  | 0.302045 |
|                                                  | 5     | 25    | Rectifier            | 0.060293  | 0.086917 | –0.148923   | 0.266979   | 0.856722  | 0.126211 |
|                                                  | 6     | 50    | Rectifier            | 0.370232  | 0.281834 | –0.095049   | 0.199319   | 0.758652  | 0.107893 |
| Model 24                                         | 7     | 1     | Linear               | 0.031526  | 0.020879 | –0.003848   | 0.07567    | 0.367029  | –        |
|                                                  | 2     | 50    | Maxout               | 0.061941  | 0.057871 | –0.036945   | 0.287431   | 0.251574  | 0.22899  |
|                                                  | 3     | 25    | Maxout               | 0.322725  | 0.214523 | –0.078072   | 0.231413   | 0.887731  | 0.189166 |
|                                                  | 4     | 5     | Maxout               | 0.073911  | 0.052297 | –0.034986   | 0.208605   | 0.991893  | 0.055546 |
|                                                  | 5     | 25    | Maxout               | 0.083282  | 0.069542 | –0.126936   | 0.218928   | 0.87782   | 0.063283 |
|                                                  | 6     | 50    | Maxout               | 0.61245   | 0.247067 | –0.025954   | 0.156373   | 0.597368  | 0.118381 |
|                                                  | 7     | 1     | Linear               | 0.009178  | 0.003232 | 0.005515    | 0.033739   | 0.26868   | –        |
| Type: HT = $f(\text{DBH, Age, Agroclimatology})$ |       |       |                      |           |          |             |            |           |          |
| Model                                            | Layer | Units | Activation Functions | mean_rate | rate_rms | mean_weight | weight_rms | mean_bias | bias_rms |
| Model 1                                          | 2     | 10    | Tanh                 | 0.017769  | 0.012133 | 0.031954    | 0.402637   | –0.08102  | 0.228244 |
|                                                  | 3     | 10    | Tanh                 | 0.166156  | 0.28518  | –0.036009   | 0.410951   | 0.212809  | 0.19991  |
|                                                  | 4     | 1     | Linear               | 0.006547  | 0.002588 | –0.078566   | 0.288912   | 0.416828  | –        |
| Model 2                                          | 2     | 10    | Rectifier            | 0.019995  | 0.011243 | 0.018187    | 0.397016   | 0.302136  | 0.47315  |
|                                                  | 3     | 10    | Rectifier            | 0.029428  | 0.042508 | –0.103747   | 0.394138   | 0.885689  | 0.289057 |
|                                                  | 4     | 1     | Linear               | 0.004931  | 0.004454 | –0.059233   | 0.189176   | 0.049152  | –        |
| Model 3                                          | 2     | 10    | Maxout               | 0.058719  | 0.037023 | –0.049898   | 0.492411   | 0.039224  | 0.475736 |
|                                                  | 3     | 10    | Maxout               | 0.135761  | 0.124885 | –0.178151   | 0.473181   | 0.54635   | 0.355156 |
|                                                  | 4     | 1     | Linear               | 0.002139  | 0.000855 | 0.018985    | 0.088782   | 0.276896  | –        |



|          |   |    |           |          |          |           |          |           |          |
|----------|---|----|-----------|----------|----------|-----------|----------|-----------|----------|
| Model 4  | 2 | 10 | Tanh      | 0.01772  | 0.010817 | 0.002702  | 0.449197 | -0.067247 | 0.368278 |
|          | 3 | 5  | Tanh      | 0.01172  | 0.004037 | -0.027845 | 0.43444  | -0.055942 | 0.378989 |
|          | 4 | 1  | Linear    | 0.004494 | 0.001461 | -0.183933 | 0.439689 | 0.494458  | -        |
| Model 5  | 2 | 10 | Rectifier | 0.027809 | 0.022439 | -0.035958 | 0.74431  | 0.467376  | 0.807189 |
|          | 3 | 5  | Rectifier | 0.009565 | 0.011513 | -0.123187 | 0.462188 | 1.170674  | 0.463472 |
|          | 4 | 1  | Linear    | 0.002874 | 0.00224  | -0.07506  | 0.234872 | 1.2554    | -        |
| Model 6  | 2 | 10 | Maxout    | 0.040519 | 0.025473 | -0.031793 | 0.399178 | 0.259886  | 0.397305 |
|          | 3 | 5  | Maxout    | 0.068518 | 0.088199 | -0.048701 | 0.464859 | 0.81131   | 0.190275 |
|          | 4 | 1  | Linear    | 0.001744 | 0.000873 | 0.046502  | 0.145933 | 0.247894  | -        |
| Model 7  | 2 | 10 | Tanh      | 0.020647 | 0.018898 | -0.014836 | 0.623164 | 0.037001  | 0.45913  |
|          | 3 | 5  | Tanh      | 0.007963 | 0.002838 | -0.030552 | 0.538301 | -0.125273 | 0.362512 |
|          | 4 | 2  | Tanh      | 0.004532 | 0.001462 | -0.302339 | 0.454158 | -0.057111 | 0.414462 |
| Model 8  | 5 | 1  | Linear    | 0.004855 | 0.001461 | -0.052192 | 1.17997  | 0.679942  | -        |
|          | 2 | 10 | Rectifier | 0.030041 | 0.017187 | -0.026989 | 0.450131 | 0.291379  | 0.550476 |
|          | 3 | 5  | Rectifier | 0.025496 | 0.038308 | -0.04973  | 0.374264 | 1.128406  | 0.423793 |
| Model 9  | 4 | 2  | Rectifier | 0.057688 | 0.072536 | -0.17228  | 0.49948  | 0.867076  | 0.597898 |
|          | 5 | 1  | Linear    | 0.002357 | 0.000839 | -0.496759 | 0.433518 | 2.513863  | -        |
|          | 2 | 10 | Maxout    | 0.037563 | 0.02584  | -0.033921 | 0.377372 | 0.503946  | 0.309093 |
| Model 10 | 3 | 5  | Maxout    | 0.024294 | 0.025114 | -0.060005 | 0.443682 | 0.992549  | 0.154044 |
|          | 4 | 2  | Maxout    | 0.014348 | 0.011925 | -0.04299  | 0.471184 | 0.994307  | 0.049454 |
|          | 5 | 1  | Linear    | 0.001064 | 0.000799 | 0.038715  | 0.109483 | 0.258711  | -        |
| Model 11 | 2 | 50 | Tanh      | 0.083152 | 0.061483 | -0.000449 | 0.253127 | -0.005335 | 0.220819 |
|          | 3 | 50 | Tanh      | 0.564816 | 0.342789 | -0.003665 | 0.165893 | 0.011687  | 0.231917 |
|          | 4 | 1  | Linear    | 0.010485 | 0.00632  | -0.012542 | 0.104167 | 0.173476  | -        |
| Model 12 | 2 | 50 | Rectifier | 0.059137 | 0.039066 | 0.000387  | 0.174435 | 0.276949  | 0.157009 |
|          | 3 | 50 | Rectifier | 0.35999  | 0.330648 | -0.047739 | 0.14148  | 0.834842  | 0.09443  |
|          | 4 | 1  | Linear    | 0.007173 | 0.004911 | -0.004817 | 0.071328 | 0.003006  | -        |

|          |   |    |           |          |          |           |          |           |          |
|----------|---|----|-----------|----------|----------|-----------|----------|-----------|----------|
| Model 12 | 2 | 50 | Maxout    | 0.086455 | 0.059248 | -0.005    | 0.173245 | 0.342447  | 0.095514 |
|          | 3 | 50 | Maxout    | 0.481666 | 0.27184  | -0.040513 | 0.140563 | 0.911007  | 0.047015 |
|          | 4 | 1  | Linear    | 0.006411 | 0.002964 | 0.003752  | 0.038613 | 0.02916   | -        |
| Model 13 | 2 | 50 | Tanh      | 0.054159 | 0.034909 | 0.002965  | 0.188739 | 0.007052  | 0.06701  |
|          | 3 | 25 | Tanh      | 0.314247 | 0.353277 | 0.004155  | 0.182314 | -0.00203  | 0.085996 |
|          | 4 | 1  | Linear    | 0.006762 | 0.00525  | -0.009934 | 0.185376 | 0.027173  | -        |
| Model 14 | 2 | 50 | Rectifier | 0.073916 | 0.053006 | -0.002112 | 0.200948 | 0.234002  | 0.194719 |
|          | 3 | 25 | Rectifier | 0.299786 | 0.266601 | -0.055716 | 0.178571 | 0.822871  | 0.098292 |
|          | 4 | 1  | Linear    | 0.009053 | 0.007475 | -0.019666 | 0.082774 | 0.027156  | -        |
| Model 15 | 2 | 50 | Maxout    | 0.152661 | 0.112157 | -0.010342 | 0.213635 | 0.210542  | 0.208713 |
|          | 3 | 25 | Maxout    | 0.395436 | 0.236296 | -0.043239 | 0.177145 | 0.860448  | 0.086819 |
|          | 4 | 1  | Linear    | 0.003727 | 0.001463 | 0.004164  | 0.036838 | 0.21148   | -        |
| Model 16 | 2 | 50 | Tanh      | 0.087571 | 0.065445 | 0.021239  | 0.373925 | -0.071047 | 0.358628 |
|          | 3 | 25 | Tanh      | 0.083476 | 0.064274 | -0.015081 | 0.265059 | -0.009766 | 0.470315 |
|          | 4 | 5  | Tanh      | 0.01321  | 0.007173 | 0.017649  | 0.251376 | -0.310065 | 0.193561 |
| Model 17 | 5 | 1  | Linear    | 0.00396  | 0.001128 | -0.032478 | 0.489524 | 0.337473  | -        |
|          | 2 | 50 | Rectifier | 0.101133 | 0.062726 | 0.001233  | 0.290422 | 0.162931  | 0.367826 |
|          | 3 | 25 | Rectifier | 0.188817 | 0.206815 | -0.045646 | 0.221838 | 0.92158   | 0.181477 |
| Model 18 | 4 | 5  | Rectifier | 0.095828 | 0.196665 | -0.044752 | 0.239417 | 0.93507   | 0.145851 |
|          | 5 | 1  | Linear    | 0.005082 | 0.004618 | 0.039452  | 0.475617 | 0.253364  | -        |
|          | 2 | 50 | Maxout    | 0.058829 | 0.045515 | -0.006789 | 0.182282 | 0.401463  | 0.094294 |
| Model 19 | 3 | 25 | Maxout    | 0.113375 | 0.107364 | -0.038582 | 0.166469 | 0.947101  | 0.032678 |
|          | 4 | 5  | Maxout    | 0.193891 | 0.270437 | 0.023331  | 0.240929 | 0.903875  | 0.186935 |
|          | 5 | 1  | Linear    | 0.00253  | 0.001809 | -0.000745 | 0.30056  | 0.050658  | -        |
| Model 19 | 2 | 10 | Tanh      | 0.015524 | 0.007917 | -0.006673 | 0.762737 | 0.225696  | 0.421939 |
|          | 3 | 5  | Tanh      | 0.00845  | 0.004002 | -0.130053 | 0.56741  | 0.08361   | 0.570441 |
|          | 4 | 2  | Tanh      | 0.003089 | 0.001638 | 0.170492  | 0.403404 | 0.138155  | 0.212821 |

|          |   |    |           |          |          |           |          |           |          |
|----------|---|----|-----------|----------|----------|-----------|----------|-----------|----------|
| Model 20 | 5 | 5  | Tanh      | 0.377008 | 0.445516 | 0.045456  | 0.616771 | -0.049467 | 0.045995 |
|          | 6 | 10 | Tanh      | 0.669996 | 0.399966 | 0.063605  | 0.416829 | -0.169056 | 0.357322 |
|          | 7 | 1  | Linear    | 0.215273 | 0.209296 | -0.014685 | 0.454568 | 0.707324  | -        |
|          | 2 | 10 | Rectifier | 0.02382  | 0.013607 | 0.015371  | 0.438088 | 0.13939   | 0.270253 |
|          | 3 | 5  | Rectifier | 0.012487 | 0.008604 | 0.017828  | 0.378948 | 0.924469  | 0.121921 |
|          | 4 | 2  | Rectifier | 0.006219 | 0.002237 | -0.000996 | 0.401333 | 1.011186  | 0.045528 |
|          | 5 | 5  | Rectifier | 0.020177 | 0.040253 | -0.096541 | 0.441629 | 0.857367  | 0.229825 |
| Model 21 | 6 | 10 | Rectifier | 0.284416 | 0.349353 | -0.096288 | 0.380082 | 0.76569   | 0.176093 |
|          | 7 | 1  | Linear    | 0.065385 | 0.111666 | -0.083784 | 0.213601 | -0.14086  | -        |
|          | 2 | 10 | Maxout    | 0.017324 | 0.012343 | -0.014393 | 0.261443 | 0.433113  | 0.091907 |
|          | 3 | 5  | Maxout    | 0.009937 | 0.007738 | -0.064593 | 0.37025  | 0.961344  | 0.050957 |
|          | 4 | 2  | Maxout    | 0.255017 | 0.429882 | -0.00885  | 0.462351 | 0.962104  | 0.024152 |
|          | 5 | 5  | Maxout    | 0.005749 | 0.00524  | -0.02027  | 0.484199 | 0.940865  | 0.06659  |
|          | 6 | 10 | Maxout    | 0.083    | 0.184436 | -0.05578  | 0.370252 | 0.944376  | 0.093347 |
| Model 22 | 7 | 1  | Linear    | 0.003598 | 0.003719 | 0.142787  | 0.189176 | 0.007737  | -        |
|          | 2 | 50 | Tanh      | 0.070013 | 0.047093 | 0.000097  | 0.295952 | 0.006742  | 0.226937 |
|          | 3 | 25 | Tanh      | 0.081047 | 0.067986 | -0.002687 | 0.236475 | 0.105284  | 0.300882 |
|          | 4 | 5  | Tanh      | 0.011976 | 0.007099 | 0.013593  | 0.249915 | 0.127547  | 0.105581 |
|          | 5 | 25 | Tanh      | 0.349679 | 0.291097 | -0.012033 | 0.197627 | -0.028139 | 0.072596 |
|          | 6 | 50 | Tanh      | 0.850989 | 0.25096  | 0.003767  | 0.151819 | -0.008177 | 0.196218 |
|          | 7 | 1  | Linear    | 0.122661 | 0.09301  | 0.032893  | 0.12788  | 0.469652  | -        |
| Model 23 | 2 | 50 | Rectifier | 0.096679 | 0.070566 | 0.002886  | 0.277744 | 0.138857  | 0.325102 |
|          | 3 | 25 | Rectifier | 0.168673 | 0.194563 | -0.04877  | 0.215119 | 0.868833  | 0.138363 |
|          | 4 | 5  | Rectifier | 0.068356 | 0.081255 | -0.015702 | 0.279349 | 0.957176  | 0.112375 |
|          | 5 | 25 | Rectifier | 0.110022 | 0.11586  | -0.111061 | 0.27299  | 0.901068  | 0.076254 |
|          | 6 | 50 | Rectifier | 0.449095 | 0.333592 | -0.060609 | 0.189248 | 0.64688   | 0.161732 |
|          | 7 | 1  | Linear    | 0.052414 | 0.033119 | 0.000633  | 0.072156 | -0.100023 | -        |

|             |   |    |        |          |          |           |          |          |          |
|-------------|---|----|--------|----------|----------|-----------|----------|----------|----------|
| Model<br>24 | 2 | 50 | Maxout | 0.1152   | 0.074469 | -0.017504 | 0.233187 | 0.307084 | 0.17575  |
|             | 3 | 25 | Maxout | 0.284687 | 0.2194   | -0.042373 | 0.193434 | 0.911435 | 0.101028 |
|             | 4 | 5  | Maxout | 0.087425 | 0.081109 | -0.021262 | 0.208157 | 0.985801 | 0.040794 |
|             | 5 | 25 | Maxout | 0.089502 | 0.096213 | -0.114057 | 0.205502 | 0.879046 | 0.079104 |
|             | 6 | 50 | Maxout | 0.550647 | 0.261109 | -0.024842 | 0.142089 | 0.750889 | 0.092851 |
|             | 7 | 1  | Linear | 0.008658 | 0.002942 | 0.00568   | 0.027364 | 0.229016 | -        |
